# Supplementary material for: Preparation of phosphine-functionalized polystyrene stars by metal catalyzed controlled radical copolymerization and their application to hydroformylation catalysis
Source: Royal Society of Chemistry journal article supplement (doi:10.1039/c3dt33082f), 2013-01-01
Supplement: c3dt33082f.pdf [file c3dt33082f.pdf]

# Preparation of Phosphine-Functionalized Polystyrene Stars by Metal Catalyzed Living Radical Copolymerization and Their Application to Hydroformylation Catalysis.

Andrés F. Cardozo,<sup>a,b,c</sup> Eric Manoury<sup>a,c</sup>, Carine Julcour<sup>b,c</sup>, Jean-François Blanco<sup>b,c</sup>, Henri Delmas<sup>b,c</sup>, Florence Gayet,<sup>a,c</sup> Rinaldo Poli<sup>\*a,c,d</sup>

*Received (in XXX, XXX) Xth XXXXXXXXX 20XX, Accepted Xth XXXXXXXXX 20XX*

DOI: 10.1039/b000000x

SUPPORTING INFORMATION

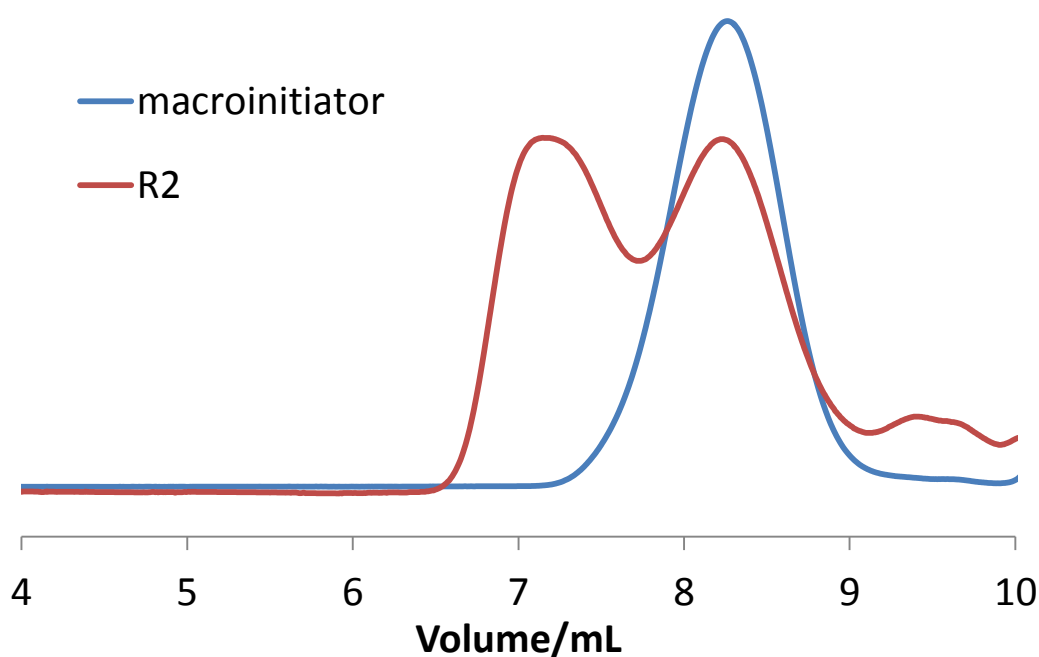

Figure S1. Size exclusion chromatogram (RI detector) for a P(S-s-SDPP) star polymer obtained by cross-linking of a  $(\text{CH}_3)_2\text{C}(\text{COOEt})-(\text{S}_{40}\text{-co-SDPP}_{12})\text{-Br}$  macroinitiator with DVB under ATRP conditions.

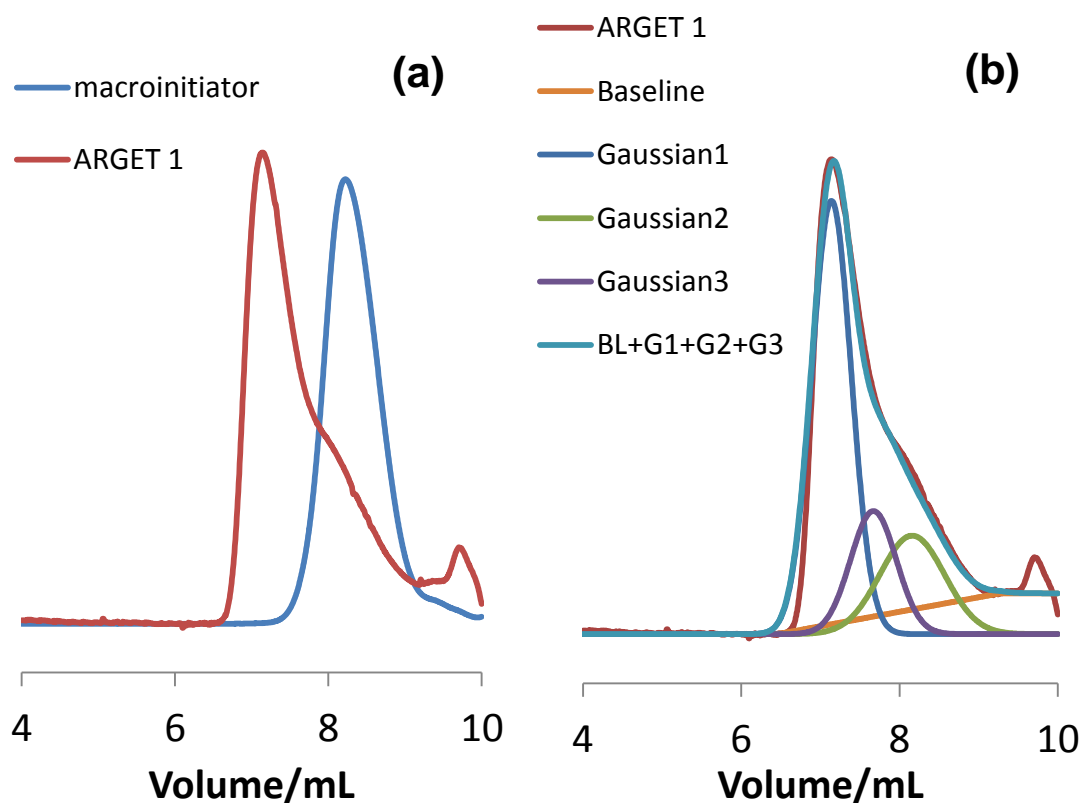

Figure S2. Size exclusion chromatogram (RI detector) for a P(S-s-SDPP) star polymer obtained by cross-linking of a  $(\text{CH}_3)_2\text{C}(\text{COOEt})-(\text{S}_{40}\text{-co-SDPP}_{12})\text{-Br}$  macroinitiator with DVB under ARGET-ATRP conditions: comparison with the SEC of the macroinitiator (a); deconvolution as the sum of three Gaussians (b). Distribution G3 is centered on the elution volume of the macroinitiator.

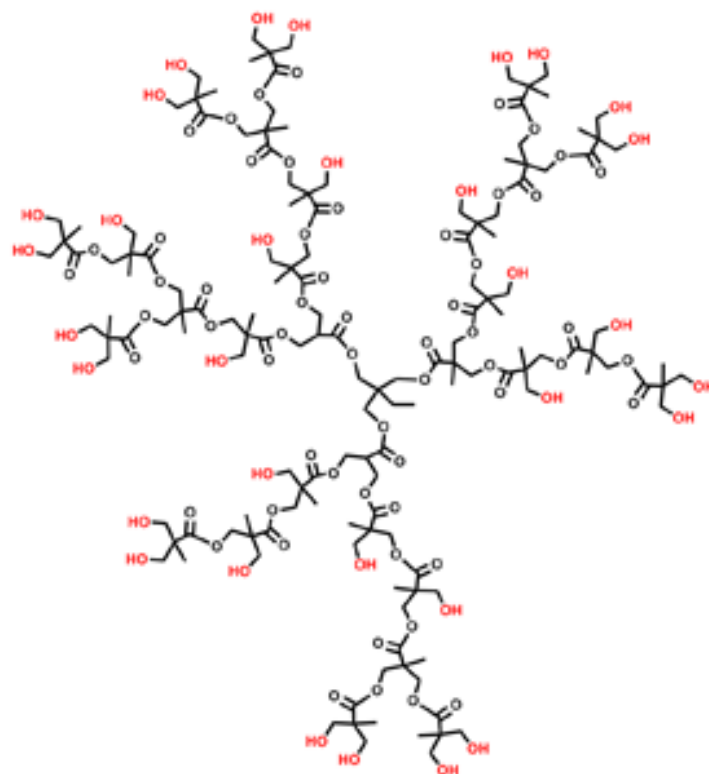

Figure S3. A representative molecule in Boltorn™ H30.

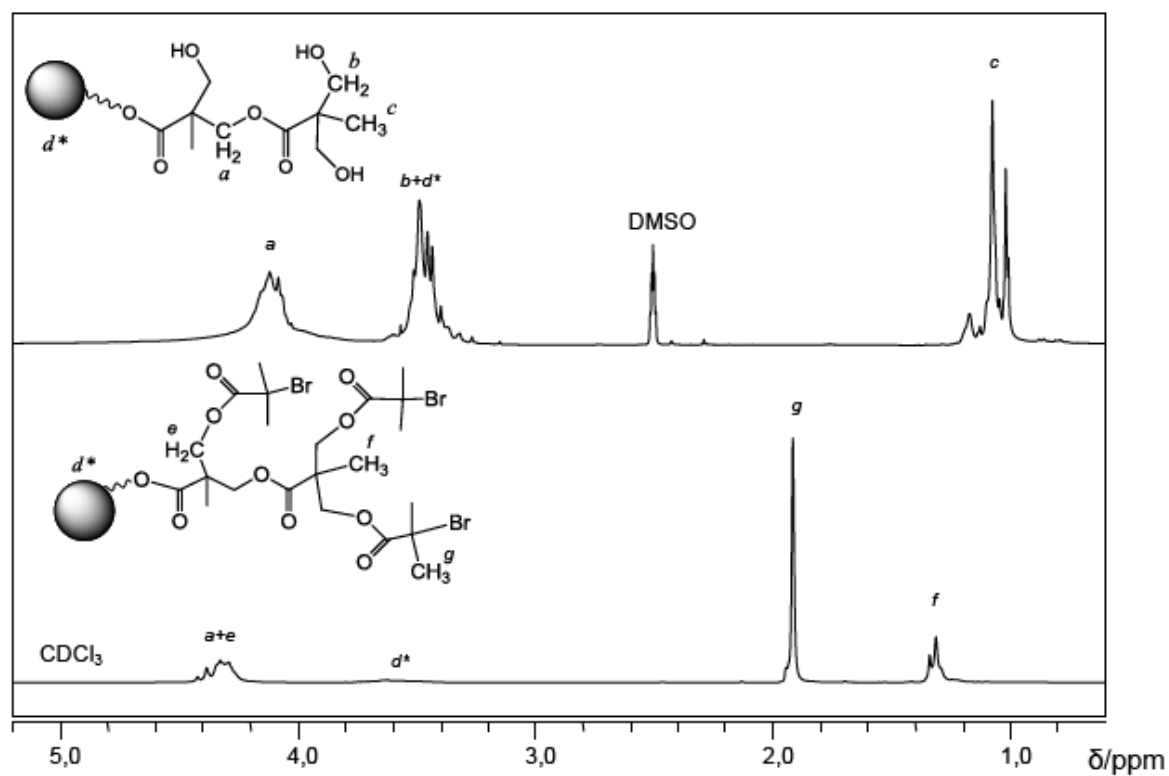

Figure S4.  $^1\text{H}$  NMR analysis of Boltorn™ H30 and the product of acylation with  $\text{CH}_3\text{CHBrCOBr}$ .

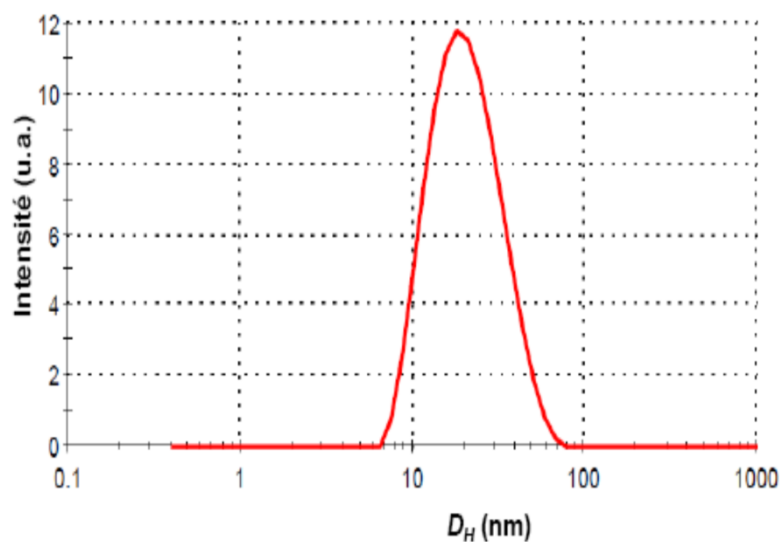

Figure S5. Size distribution of the star copolymer B-1 in toluene solution by DLS in intensity mode.

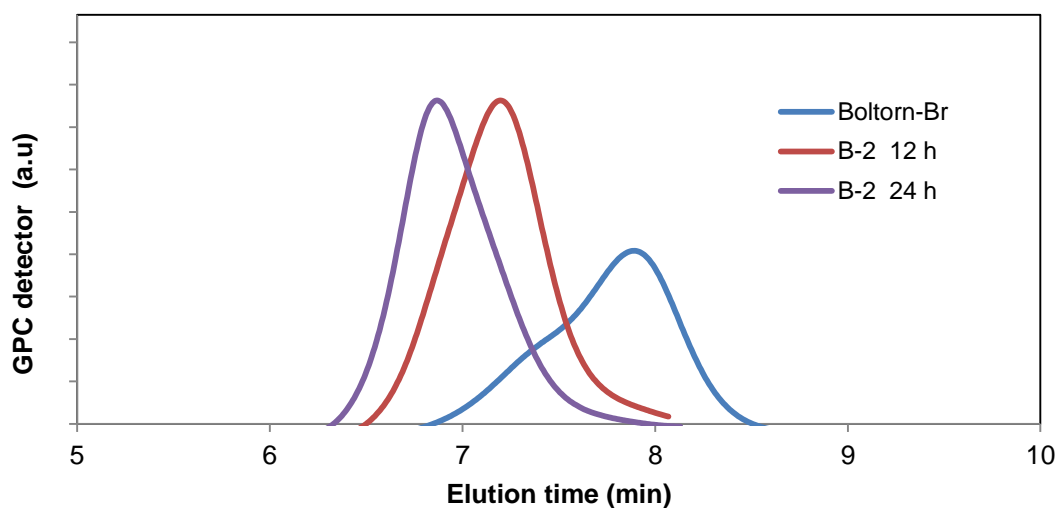

Figure S6. Evolution of the molecular weight distribution during the synthesis of polymer B-2 as measured by SEC.

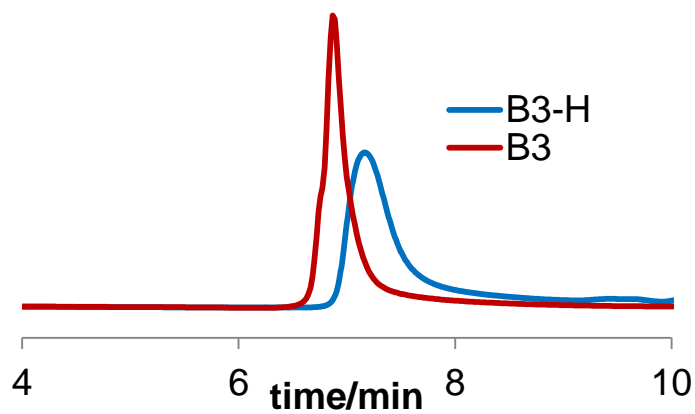

Figure S7. SEC of polymer B-3 before and after debromination (B3-H).
